# Supplementary material for: A genetically encoded, high-signal-to-noise maltose sensor
Source: PubMed Central journal article supplement (PMC3265398; doi:10.1002/prot.23118), 2011-10-12
Supplement: NIHMS349697-supplement-Supp_1.pdf [file NIHMS349697-supplement-Supp_1.pdf]

Fig. S1. MBP165-cpGFP amino acid sequence

MBP165-cpGFP

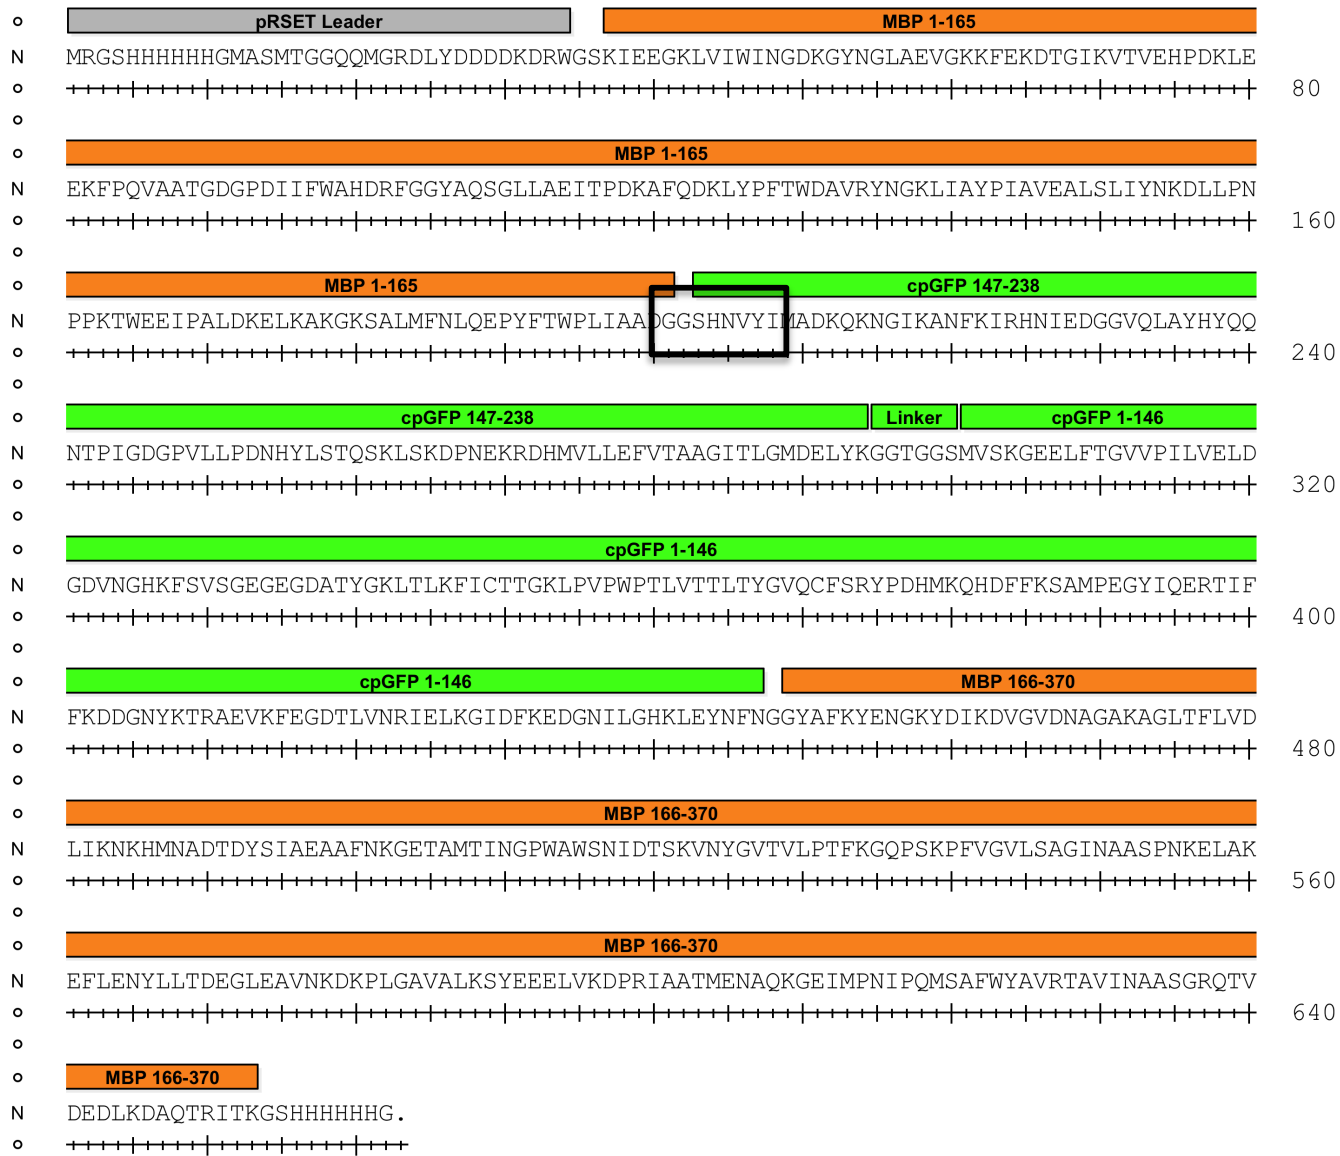

MBP165-cpGFP.PPYF

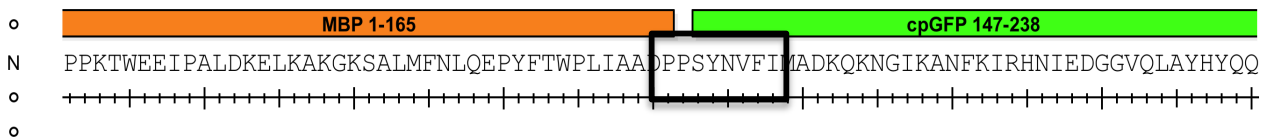

MBP165-cpGFP.PCF

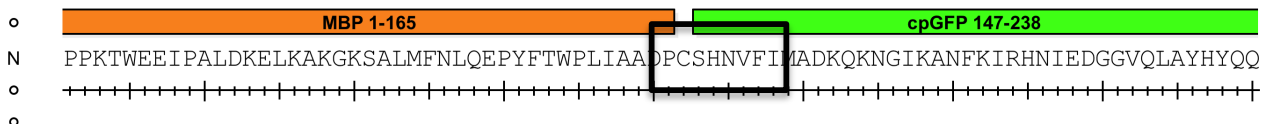



Fig. S3. MBP311-cpGFP amino acid sequence

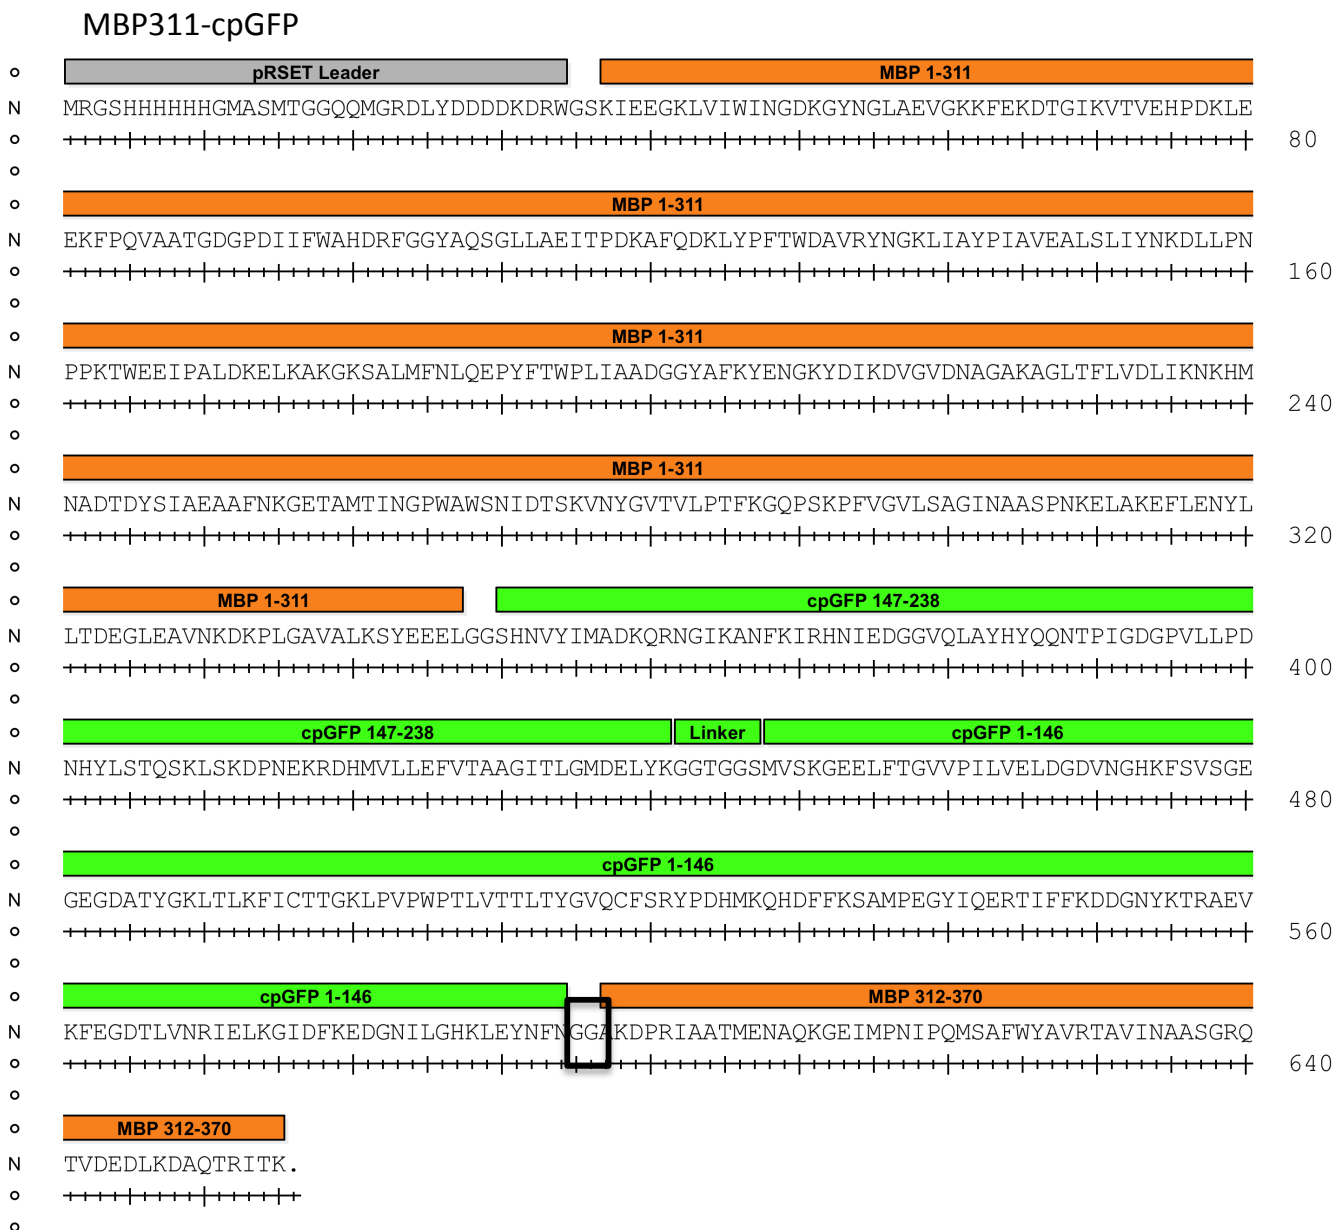

**MBP311-cpGFP.L2-NP**

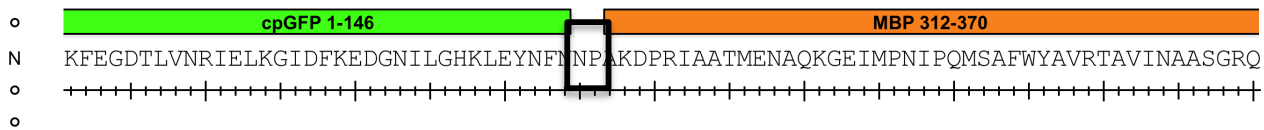

Fig. S4. MBP317-cpGFP amino acid sequence

MBP317-cpGFP

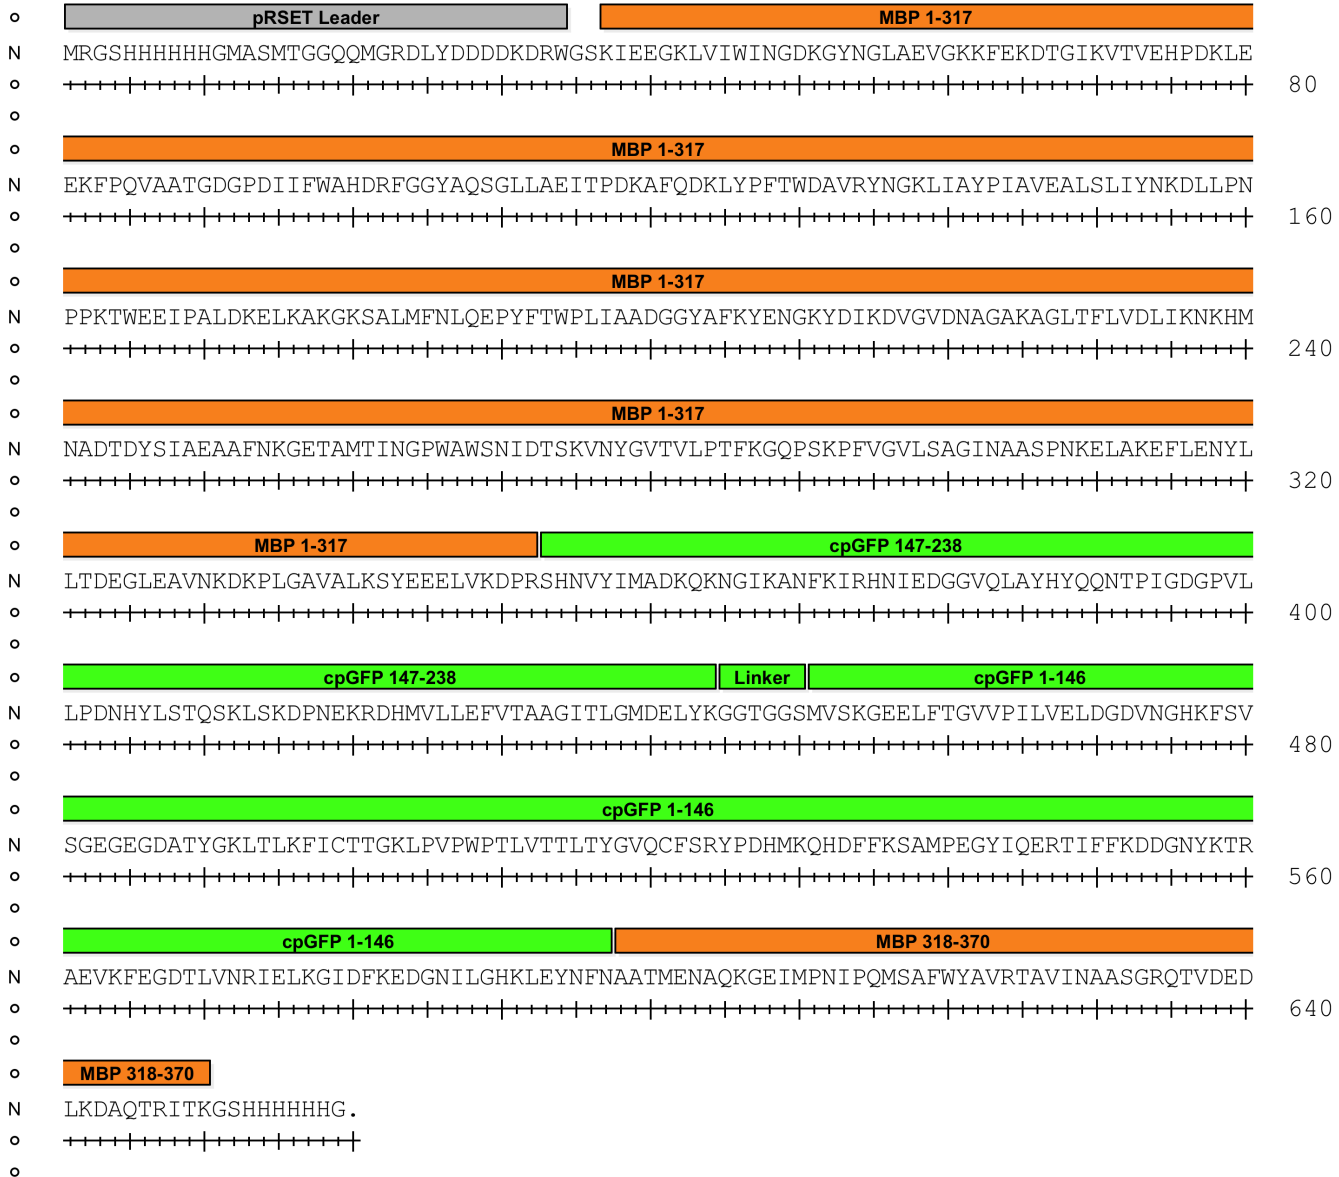

Fig. S5. Mutagenic primers used

165 Linker1 primers

PLIAADGxxNVYIM  
PLIAADxxNVYIM  
PLIAADGGxxNVYIM  
PLIAADGxPNVYIMG  
PLIAADGIxNVYIMG  
PLIAADPxSHNVYIM  
PLIAADxPSHNVYIM  
PLIAADxxSHNVYIM  
PLIAADxxSHNVFIM  
PLIAADPxSHNVFIM  
PLIAADPxSYNVFIM  
PLIAADxxSYNVFIM  
PLIAADPxSYNVFIM  
PLIAADxxSYNVFIM  
PLIAADPxSxNVYIM  
PLIAADPxSHxVYIM  
PLIAADPxSHNxYIM  
PLIAADPxSHNVxIM

165 Linker2 primers

KLEYNFNxxYAFKYEN  
KLEYNFNxYAFKYEN  
KLEYNFNyYAFKYEN  
KLEYNFxYAFKYEN  
KLEYNxxYAFKYEN  
KLEYNWxYAFKYEN  
KLEYNxKYAFKYEN  
KLEYNFNpYAFKYEN  
KLEYNFNxPYAFKYEN

175 Linker1 primers

AFKYENXXSHNVYIM

175 Linker2 primers

KLEYNFNXXKYDIKDV

311 Linker1 primers

KSYEELXXSHNVYIM  
KSYEELPXSHNVYIM  
KSYEELXPSHNVYIM

311 Linker2 primers

KLEYNFNXXAKDPRIA  
KLEYNFNpXAKDPRIA  
KLEYNFNxPAKDPRIA

317 Linker1 primers

ELAKDPRxSHNVYIM  
ELAKDPRxxSHNVYIM  
ELAKDPRxxxSHNVYIM

317 Linker2 primers

KLEYNFNxAATMENA  
KLEYNFNxxAATMENA  
KLEYNFNxxxAATMENA

Fig. S6. Plot of  $\Delta F/F$  for clarified lysate screen of cpGFP linker-screens at insertion points 165, 175, 311, and 317.

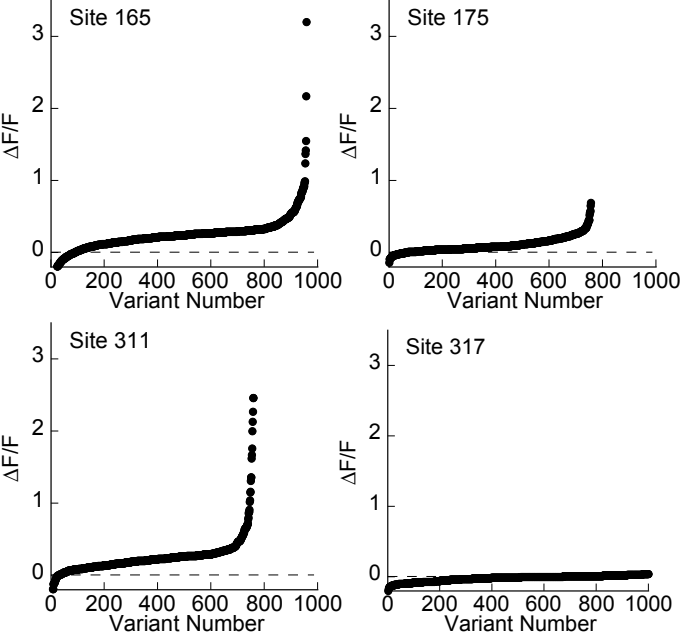

Fig. S7. MBP317-cpGFP ITC titration.

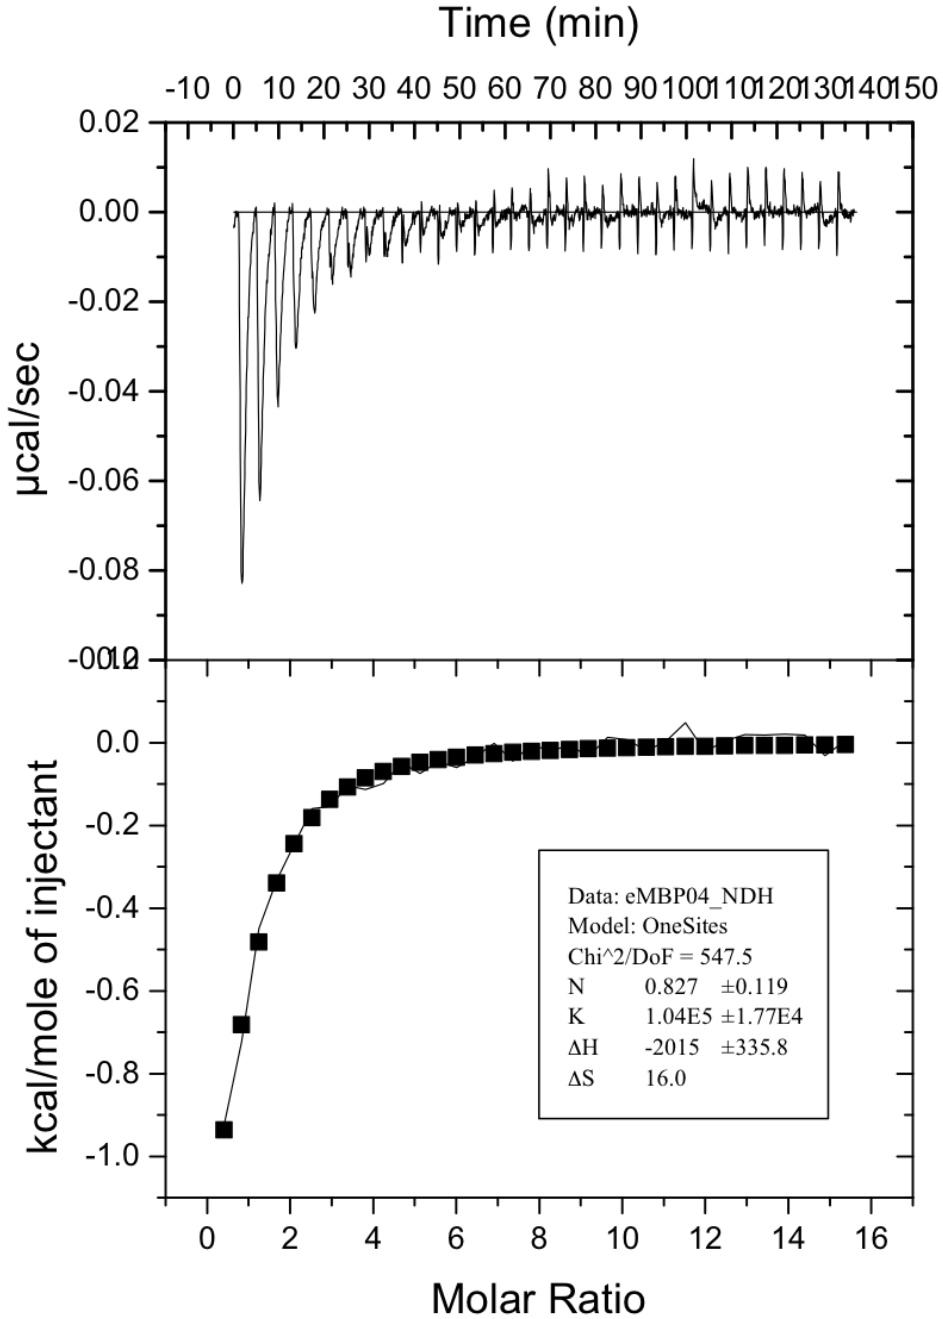

Fig. S8. Binding curves for affinity variants of MBP165-cpGFP.PPYF.

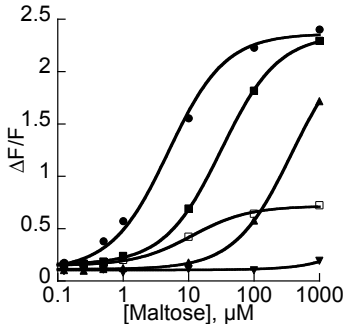



Fig. S9. Maltose and sucrose binding curves for wild-type and 5-7 variants of the MBP-cpGFP sensors.

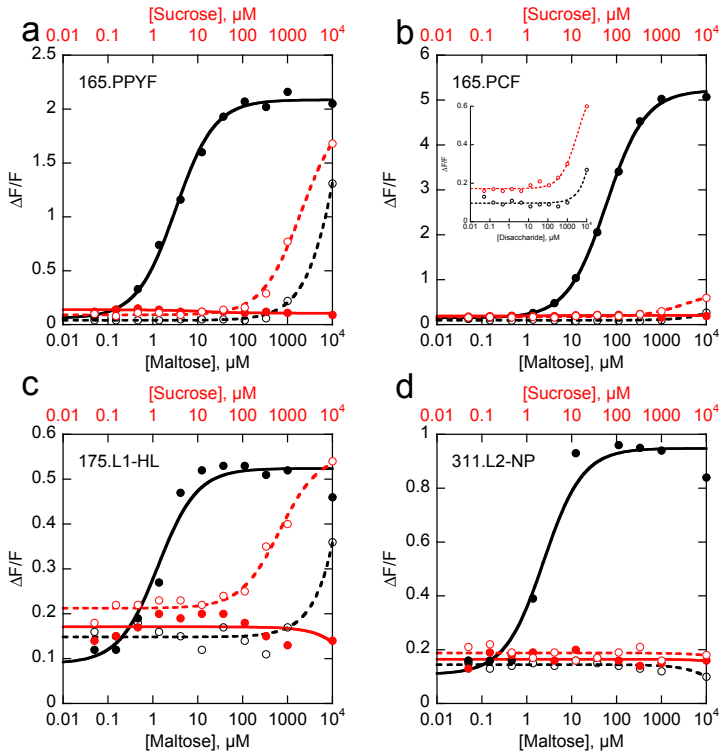

Fig. S10. Screening MBP165-cpBFP variants

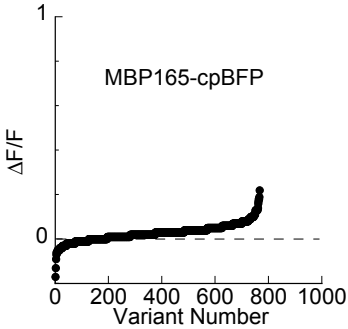

Fig. S11. *E. coli* images.

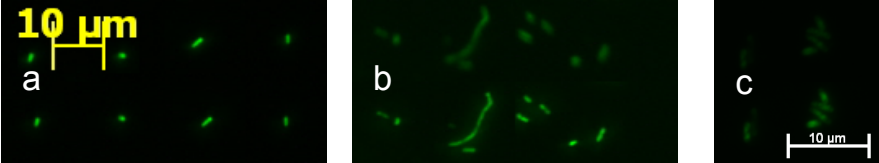

Fig. S12. 2-photon excitation spectra.

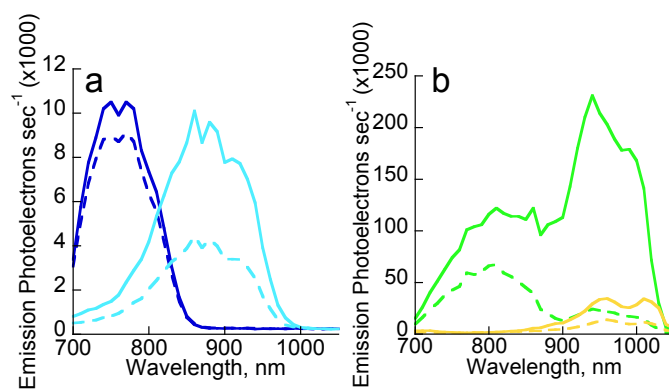

Fig. S13. Maltose concentration dependence of PPYF.T203V.

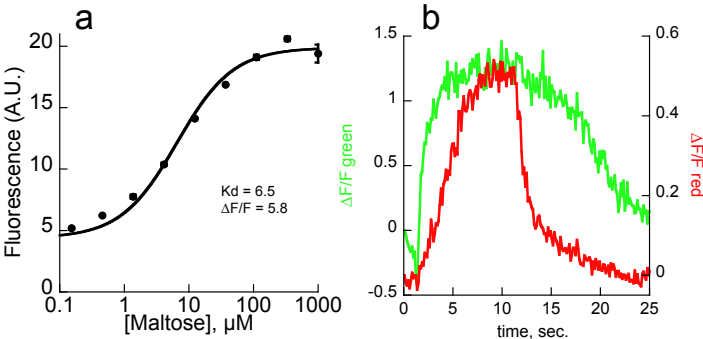

Fig. S14. Effect of GFP-T203V mutation.

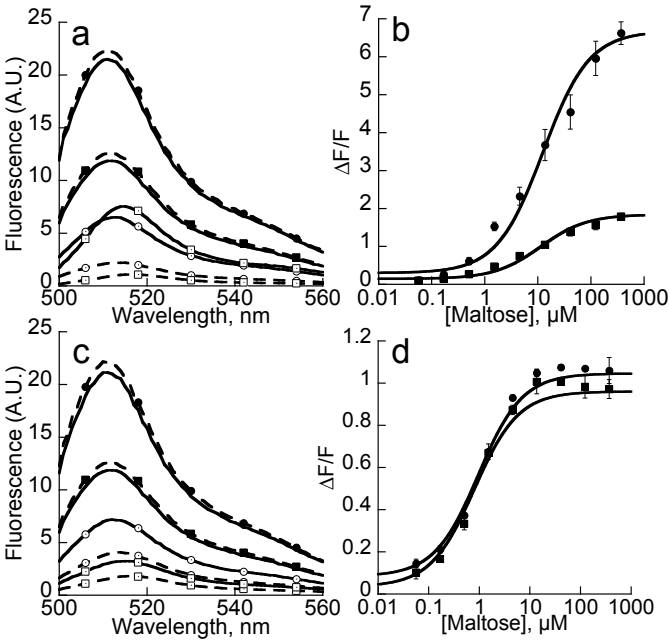

**Supplementary Table S1.** Peak fluorescence of individual bacteria.

| EGFP |      |              | PPYF |      |              | PPYF.<br>T203V |      |              |
|------|------|--------------|------|------|--------------|----------------|------|--------------|
| Apo  | Sat  | $\Delta F/F$ | Apo  | Sat  | $\Delta F/F$ | Apo            | Sat  | $\Delta F/F$ |
| 4095 | 3985 | -0.03        | 2120 | 3266 | 0.54         | 553            | 1265 | 1.29         |
| 3840 | 3575 | -0.07        | 943  | 2543 | 1.70         | 582            | 1405 | 1.41         |
| 3378 | 3244 | -0.04        | 839  | 1260 | 0.50         | 600            | 1337 | 1.23         |
| 2384 | 2540 | 0.07         | 1226 | 2964 | 1.42         | 644            | 1328 | 1.06         |
| 1533 | 1547 | 0.01         | 1054 | 2557 | 1.43         | 583            | 1260 | 1.16         |
| 906  | 863  | -0.05        | 1153 | 2359 | 1.05         | 613            | 1202 | 0.96         |
| 3542 | 3613 | 0.02         | 1025 | 2397 | 1.34         | 822            | 2028 | 1.47         |
|      |      |              | 806  | 1763 | 1.19         | 555            | 1350 | 1.43         |
|      |      |              | 756  | 1537 | 1.03         | 809            | 1844 | 1.28         |
|      |      |              | 576  | 1084 | 0.88         | 580            | 1520 | 1.62         |

**Supplementary Table S2.** X-ray data collection and refinement statistics.

|                                         | MBP175-cpGFP.L1-HL                            | MBP311-cpGFP.L2-NP     |
|-----------------------------------------|-----------------------------------------------|------------------------|
| <b>Data collection</b>                  |                                               |                        |
| X-ray beamline                          | APS 31-ID                                     | APS 31-ID              |
| Wavelength (Å)                          | 0.9793                                        | 0.9793                 |
| Space group                             | P2 <sub>1</sub> 2 <sub>1</sub> 2 <sub>1</sub> | P2 <sub>1</sub>        |
| Unit cell dimensions                    |                                               |                        |
| a, b, c (Å)                             | 81.3, 88.7, 119.4                             | 56.8, 74.8, 171.5      |
| $\alpha$ , $\beta$ , $\gamma$ (°)       | 90, 90, 90                                    | 90, 97.5, 90           |
| Resolution (Å)                          | 31.41-1.90 (2.00-1.90)                        | 34.24-2.00 (2.11-2.00) |
| $R_{\text{sym}}$                        | 0.096 (0.592)                                 | 0.118 (0.530)          |
| I / $\sigma$ I                          | 14.3 (3.9)                                    | 11.4 (3.8)             |
| Completeness (%)                        | 99.9 (100)                                    | 100 (100)              |
| Redundancy                              | 11.1 (11.1)                                   | 5.7 (5.7)              |
| <b>Refinement</b>                       |                                               |                        |
| Resolution (Å)                          | 1.90                                          | 2.00                   |
| Number of reflections                   | 65035                                         | 96467                  |
| $R_{\text{work}} / R_{\text{free}}$ (%) | 16.5/19.9                                     | 18.3/22.6              |
| Number of atoms                         | 5130                                          | 10102                  |
| Protein/maltose/water/sulfate           | 4803/23/294/10                                | 9497/46/559/0          |
| B-factors (Å <sup>2</sup> )             | 19.5                                          | 20.6                   |
| Protein/maltose/water/sulfate           | 19.2/21.4/23.6/45.2                           | 20.4/12.3/24.4/NA      |
| RMSD values                             |                                               |                        |
| Bonds (Å)/angles (°)                    | 0.027/2.019                                   | 0.022/1.868            |
| Ramachandran plot (%)                   |                                               |                        |
| Favored/allowed/disallowed              | 98.3/1.7/0                                    | 98.1/1.7/0.2           |



## Supplementary Information

### Supplementary Figure Legends

Fig. S1-S4. Amino acid sequences of the framework MBP-cpGFP proteins and optimized variants. Linker sequences that were mutated are identified with black squares.

Fig. S5. Translation of the primers used for linker optimization of the MBP-cpGFP sensors. “x” indicates that a degenerate primer (with DNA sequence “NNS”) was used to encode all 20 possible amino acids.

Fig. S6. Plot of  $\Delta F/F$  for clarified lysate screen of cpGFP linker-screens at insertion points 165, 175, 311, and 317. The horizontal dashed line at zero indicates no fluorescence change. No error bars are plotted, but standard deviations in  $\Delta F/F$  are less than 10% of an average  $\Delta F$ . (Ex. 3 repetitions for MBP165-cpGFP.PPYF yields  $\Delta F/F$  values of 2.51, 2.63, 2.54.) Artifacts resulting from incomplete clearing of lysate are easily resolved by a duplicate assay.

Fig. S7. ITC of MBP317-cpGFP demonstrates that the protein binds maltose, even though the linker screen failed to produce variants with a change in fluorescence.

Fig. S8. Binding curves for affinity variants of MBP165-cpGFP.PPYF. Data is fit to a single-binding site isotherm. Curve-fit affinities are: WT binding pocket, 5  $\mu\text{M}$  (●); W230A, 32  $\mu\text{M}$  (■); W62A, 375  $\mu\text{M}$  (▲); W340A, > 1mM (▼); I329W, 11  $\mu\text{M}$  (□).

Fig. S9. Maltose (black) and sucrose (red) binding curves for wild-type (filled, solid lines) and 5-7 variants (open, dashed lines) of the MBP-cpGFP sensors. MBP165-

cpGFP.PPYF (a); MBP165-cpGFP.PCF (b); MBP175-cpGFP.L1-HL (c); MBP311-cpGFP.L2-NP (d).

Fig. S10. Plot of  $\Delta F/F$  for clarified lysate screen of MBP165-cpBFP linker-screen.

The horizontal dashed line at zero indicates no fluorescence change.

Fig. S11. Images of individual *E. coli* BL21(DE3) bacteria expressing (a) EGFP, (b) PPYF, or (c) PPYF.T203V in the absence (top) and presence (bottom) of maltose.

Fig. S12. 2-photon excitation spectra. MBP165-cpAzurite.L2-FE (a), -cpCFP.PCF (a), -cpGFP.PPYF (b), and -cpYFP.PPYF (b) were excited at the wavelengths indicated and emission measured through appropriate wavelength filters. Two graphs are shown to present different y-axis scales. Optimal  $\Delta F/F$  values for 2-photon excitation of the spectral variants of MBP165 are: -cpAzurite, 1.1 (ex 760 nm); -cpCFP, 2.3 (ex 830-960 nm); -cpGFP, 10.0 (ex 940 nm); -cpYFP, 2.6 (ex 940 nm).

Fig. S13. Quantification of MBP165-cpGFP.PPYF.T203V fluorescence when displayed on the surface of HEK cells. (a) Concentration dependence. (b) Observed fluorescence after a “puff” of HBSS solution containing 1 mM maltose and 2.5 nM Alexa Fluor® 568 (Invitrogen, Carlsbad, CA). The onset of increasing green (maltose sensing) fluorescence and red (Alexa Fluor® 568) fluorescence is occurs at the same time, indicating that the sensor responds as quickly a diffusion in this set up. The prolonged response of the maltose sensor is likely a consequence of its high affinity for maltose, while the Alexa dye diffuses rapidly.

Fig. S14. Effect of GFP-T203V mutation. (a) Emission spectra of 1  $\mu$ M purified eGFP (filled circles), cpGFP (filled squares), MBP165-cpGFP.PPYF (open circles), and

MBP165-cpGFP.PPYF+T203V (open squares) in the absence (dashed lines) or presence (solid lines) of 1 mM maltose. cpGFP is half as bright as eGFP, and the saturated MBP165-cpGFP.PPYF variants are about half as bright as cpGFP. Note that mutation T203V decreases the fluorescence of the apo-state of MBP165-cpGFP.PPYF and slightly increases the saturated state. (b) Titration of maltose for MBP165-cpGFP.PPYF (filled squares), and MBP165-cpGFP.PPYF+T203V (filled circles). Affinities for each protein are the same, but with different  $\Delta F/F$ . (c) Emission spectra of 1  $\mu\text{M}$  purified eGFP (filled circles), cpGFP (filled squares), MBP311-cpGFP.L2-NP (open circles), and MBP311-cpGFP.L2-NP+T203V (open squares) in the absence (dashed lines) or presence (solid lines) of 1 mM maltose. Note that mutation T203V decreases the fluorescence of both the apo-state and the saturated state of MBP311-cpGFP.L2-NP. (d) Titration of maltose for MBP311-cpGFP.L2-NP (filled squares), and MBP311-cpGFP.L2-NP+T203V (filled circles). Affinities for each protein are the same, but with  $\Delta F/F$  slightly increased for the T203V variant.

### Supplementary Table Legends

Table S1. Peak fluorescence of individual bacteria. MBP165-cpGFP.PPYF: Avg.  $\Delta F/F = 1.11 \pm 0.39$ ; EGFP: Avg.  $\Delta F/F = -0.01 \pm 0.05$ .

Table S2. X-ray data collection and refinement statistics. MBP175-cpGFP.L1-HL bound to maltose was crystallized using the vapor diffusion method by mixing 1  $\mu\text{L}$  of protein solution (10 mg/mL in 20 mM Tris pH 8.0, 100 mM NaCl, 3 mM maltose) with 1  $\mu\text{L}$  of precipitant solution (0.5 M Ammonium sulfate, 0.1M Sodium citrate tribasic

dihydrate pH 5.6, 1.0 M Lithium sulfate monohydrate). Crystals of MBP175-cpGFP.L1-HL formed after 3 weeks and were cryoprotected in the precipitant solution supplemented with 25% glycerol for data collection. MBP311-cpGFP.L2-NP bound to maltose was similarly crystallized using vapor diffusion by mixing 1  $\mu$ L of protein solution (30 mg/mL in 20 mM Tris pH 8, 100 mM NaCl, 8 mM maltose) with 1.5  $\mu$ L of precipitant solution (0.1 M Sodium acetate pH 4.6, 8% w/v polyethylene glycol 4,000) at 23 °C. Crystals grew after 2 days and were cryoprotected with 30% ethylene glycol. X-ray diffraction data were collected at 100 K at beamline 31-ID of the Advanced Photon Source. Diffraction data were reduced using Mosflm (1) and Scala (2). The structures were solved using Phaser (3) from within CCP4 (4) to carry out a molecular replacement search sequentially with the cpGFP domain of the previously published GCaMP structure (residues 62-302 of PDB ID 3EKH) and the structure of maltose-bound MBP (PDB ID 1ANF). One molecule of the MBP175-cpGFP.L1-HL sensor and two MBP311-cpGFP.L2-NP sensors were present in the asymmetric units of their respective crystals. The structures were iteratively rebuilt using Coot (4) and refined with Refmac5 (5), including riding hydrogens and TLS refinement in later cycles. The final models are of high quality with good stereochemistry and include most amino acids except the affinity tags, a few residues at the N- and C-termini, and the glycine-containing linkers connecting the two halves of the cpGFP domains.

## Supplementary References

1. Leslie A (1992) Recent Changes to the MOSFLM Package for Processing Film and Image Plate Data. *Joint CCP4 + ESF-EAMCB Newsletter on Protein Crystallography*.
2. CCP4 (1994) The CCP4 suite: programs for protein crystallography. *Acta Crystallogr D Biol Crystallogr* 50:760-763.
3. McCoy AJ, et al. (2007) Phaser crystallographic software. *J App Crystallogr* 40:658-674.
4. Emsley P & Cowtan K (2004) Coot: model-building tools for molecular graphics. *Acta Crystallogr D Biol Crystallogr* 60:2126-2132.
5. Murshudov GN, Vagin AA, & Dodson EJ (1997) Refinement of macromolecular structures by the maximum-likelihood method. *Acta Crystallogr D Biol Crystallogr* 53:240-255.
